# Supplementary material for: Reconciling species diversity in a tropical plant clade (Canarium, Burseraceae)
Source: PubMed Central journal article supplement (PMC6003679; doi:10.1371/journal.pone.0198882), 2018-06-15
Supplement: pone.0198882.s003.pdf [file pone.0198882.s003.pdf]

### 3 species

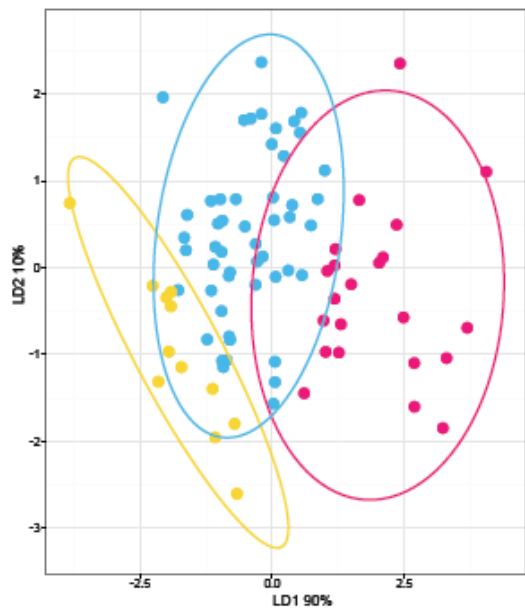

### 4 species

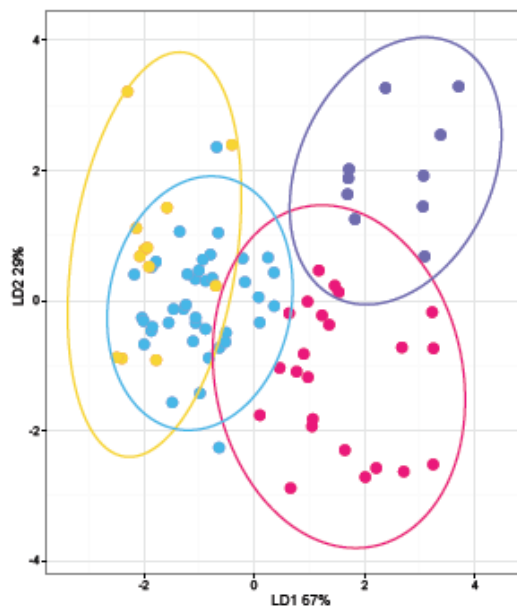

### 5 species

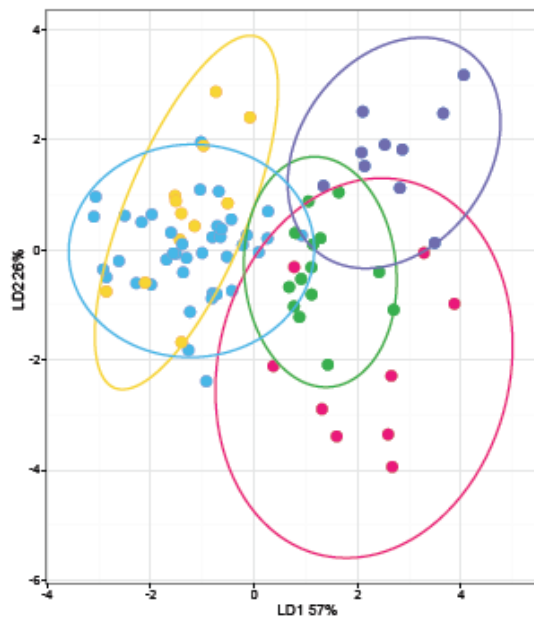

### 6 species

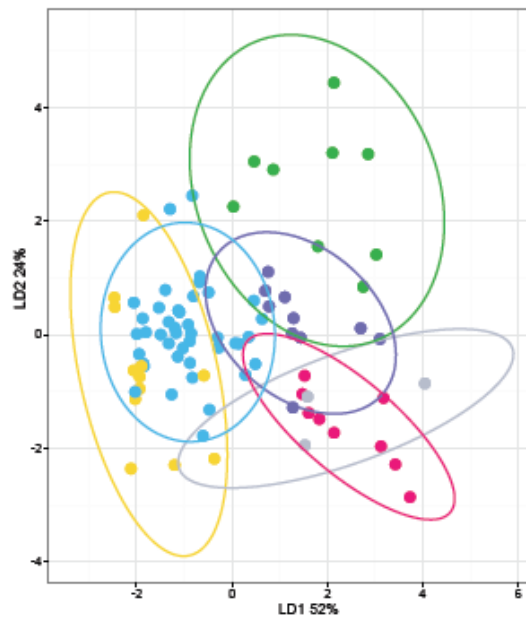

Clade

1

2A

2B

2C

3A

3BC
