# Supplementary material for: Reconciling species diversity in a tropical plant clade (Canarium, Burseraceae)
Source: PubMed Central journal article supplement (PMC6003679; doi:10.1371/journal.pone.0198882), 2018-06-15

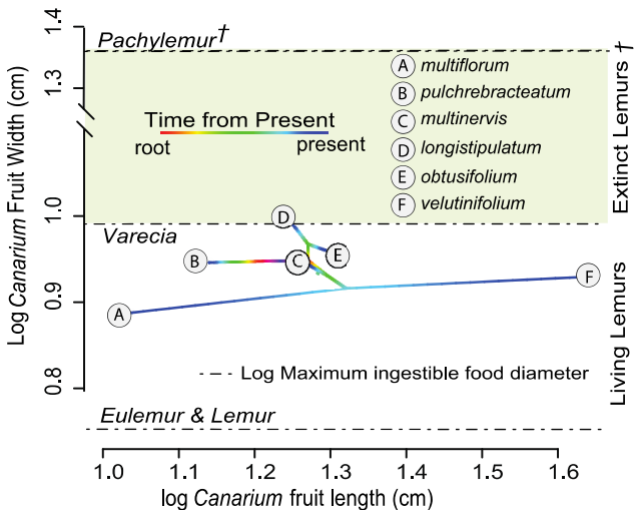

Supplement: pone.0198882.s004.pdf [file pone.0198882.s004.pdf]
