# Supplementary material for: Reconciling species diversity in a tropical plant clade (Canarium, Burseraceae)
Source: PLoS One. 2018 Jun 15;13(6):e0198882. doi: 10.1371/journal.pone.0198882 (PMC6003679; doi:10.1371/journal.pone.0198882)
Supplement: S2 Table — (CSV) [file pone.0198882.s006.csv]

Species	Total number of specimens known	Specimens in fruit	Specimens in flower (m)	Sspecimens in flower (f)	Specimens in phylogeny
ampasindavae	1	0	0	0	0
angulatum	1	0	0	0	0
arcuatum	3	1	0	1	0
bullatum	21	12	2	2	0
findens	3	1	0	0	0
indistinctum	1	1	0	0	0
laxiflorum	1	0	0	0	0
manongarivum	1	0	0	0	0
moramangae	4	2	0	0	0
obovatum	2	0	1	0	0
pallidum	1	0	1	0	0
subsidarium	5	3	1	0	0
subtilis	3	3	0	0	0
egregium	7	1	1	1	1
elegans	9	4	2	0	1
longistipulatum	13	4	5	0	1
betamponae	12	6	0	0	2
compressum	12	7	0	1	2
ferrugineum	23	4	2	0	2
galokense	6	1	1	0	2
globosum	37	24	1	2	2
multinervis	5	1	2	0	2
obtusifolium	38	21	1	2	2
pilicarpum	14	3	1	0	2
planifolium	13	4	3	1	2
scholasticum	53	36	4	3	2
lamianum	98	63	9	1	3
pulchrebracteatum	32	15	1	0	3
velutinifolium	4	1	0	0	3
multiflorum	49	27	0	2	6
boivinii	4	3	1	0	0*
madagascariense	2	1	0	0	0*
ntidifolium	6	0	0	0	0*
#* sampled, but sequencing coverage insufficient for inclusion in the phylogeny
